# Supplementary material for: Risk factors for venous thromboembolism after vascular surgery and implications for chemoprophylaxis strategies
Source: PubMed Central journal article supplement — J Vasc Surg Venous Lymphat Disord. Author manuscript; Available in PMC 2023 May 1. (PMC9056001; doi:10.1016/j.jvsv.2021.10.001), 2021-10-09
Supplement: NIHMS1801119-supplement-1.pdf [file NIHMS1801119-supplement-1.pdf]

**Supplementary Table I (online only).** Upper extremity, lower extremity, and central venous catheter-associated DVT

| DVT                          | Central venous catheter association |          | Total    |
|------------------------------|-------------------------------------|----------|----------|
|                              | Yes                                 | No       |          |
| Upper extremity <sup>a</sup> | 12 (0.8)                            | 6 (0.4)  | 18 (1.2) |
| Lower extremity <sup>b</sup> | 1 (0.1)                             | 18 (1.2) | 19 (1.3) |
| Total                        | 13 (0.9)                            | 24 (1.7) | 37 (2.6) |

DVT, Deep vein thrombosis.  
Data presented as number (% of total cohort [n = 1449]).  
<sup>a</sup>Included axillary, subclavian, and internal jugular vein DVTs.  
<sup>b</sup>Included popliteal, femoral, and iliac vein DVTs.

**Supplementary Table II (online only).** Logistic regression for association of Caprini score with postoperative and postdischarge VTE<sup>a</sup>

| Caprini score, points     | Odds ratio (95% CI) |         |                   |         |
|---------------------------|---------------------|---------|-------------------|---------|
|                           | VTE                 | P value | Postdischarge VTE | P value |
| 2-6 (reference; n = 1033) | 1.0                 | NA      | NA                | NA      |
| 7-9 (n = 321)             | 3.6 (1.8-7.0)       | <.01    | 3.3 (1.1-9.4)     | .03     |
| ≥10 (n = 95)              | 10.3 (4.9-21.7)     | <.01    | 6.4 (1.9-22.4)    | <.01    |

CI, Confidence interval; NA, not applicable; VTE, venous thromboembolism.  
<sup>a</sup>C-statistic = 0.71 for all VTE and 0.68 for postdischarge VTE (n = 1449).

**Supplementary Table III (online only).** Cox proportional hazards model for association of VTE with mortality (N = 1449; n = 49 for VTE, including symptomatic and asymptomatic; C-statistic = 0.74)

| Variable                    | HR  | 95% CI  | P value |
|-----------------------------|-----|---------|---------|
| Postoperative VTE           | 2.7 | 1.3-5.9 | .01     |
| Age, years                  |     |         |         |
| <60 (reference)             | 1.0 |         |         |
| 61-70                       | 1.1 | 0.5-2.1 | .84     |
| 71-80                       | 1.6 | 0.8-3.0 | .18     |
| >80                         | 1.8 | 0.9-3.6 | .11     |
| ESRD                        | 2.7 | 1.7-4.4 | <.01    |
| Prior VTE                   | 0.7 | 0.3-1.8 | .41     |
| Length of stay (per 5 days) | 1.1 | 0.9-1.3 | .40     |
| Nonelective admission       | 2.9 | 1.7-5.0 | <.01    |
| Procedure type              |     |         |         |
| Open aortic (reference)     | 1.0 |         |         |
| TEVAR                       | 0.6 | 0.3-1.2 | .13     |
| EVAR                        | 0.3 | 0.1-0.9 | .04     |
| Lower extremity bypass      | 0.5 | 0.3-0.9 | .02     |
| Femoral endarterectomy      | 1.0 | 0.5-2.1 | .98     |

CI, Confidence interval; ESRD, end-stage renal disease; EVAR, endovascular abdominal aortic aneurysm repair; HR, hazard ratio; TEVAR, thoracic endovascular aortic aneurysm repair; VTE, venous thromboembolism.
